# Supplementary material
Source: ML conference proceedings conference paper supplement (https://openreview.net/forum?id=B0WYWvVA2r)

# $\lambda$ Strategies on CIFAR10-LT

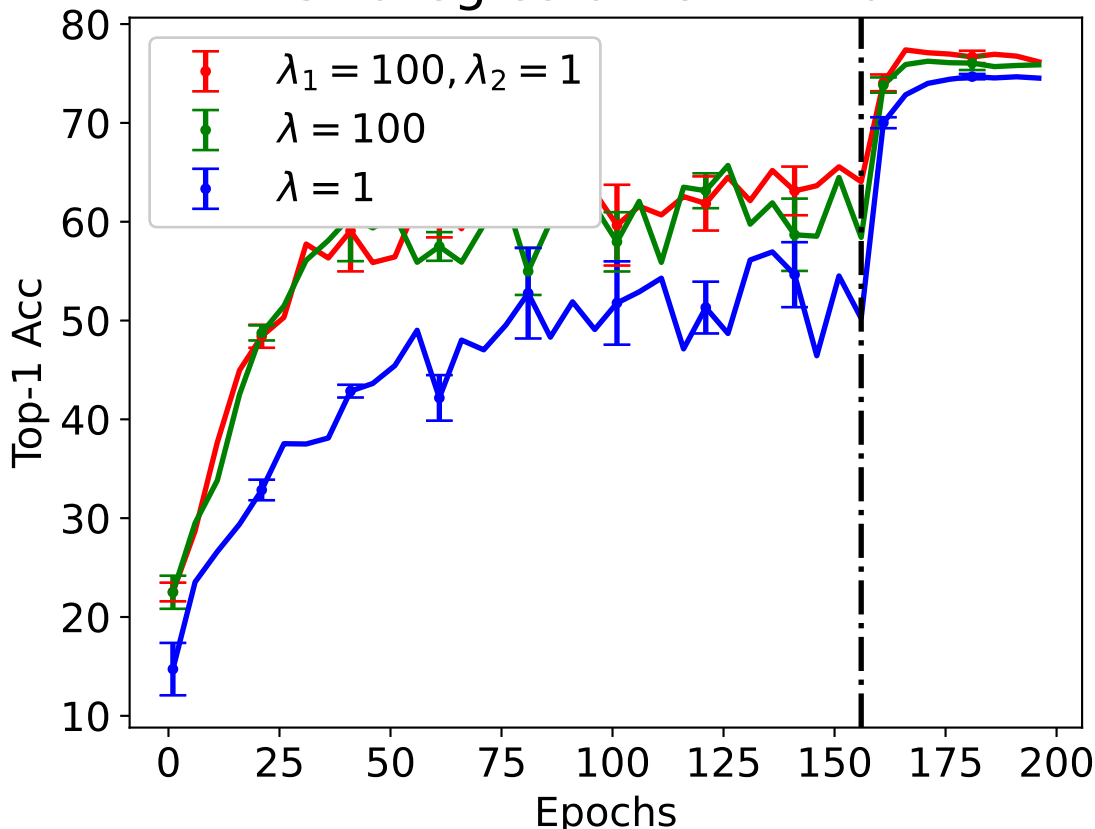

Supplement: supplementary_material [file attachment]

# Momentum Effects on CIFAR10-LT

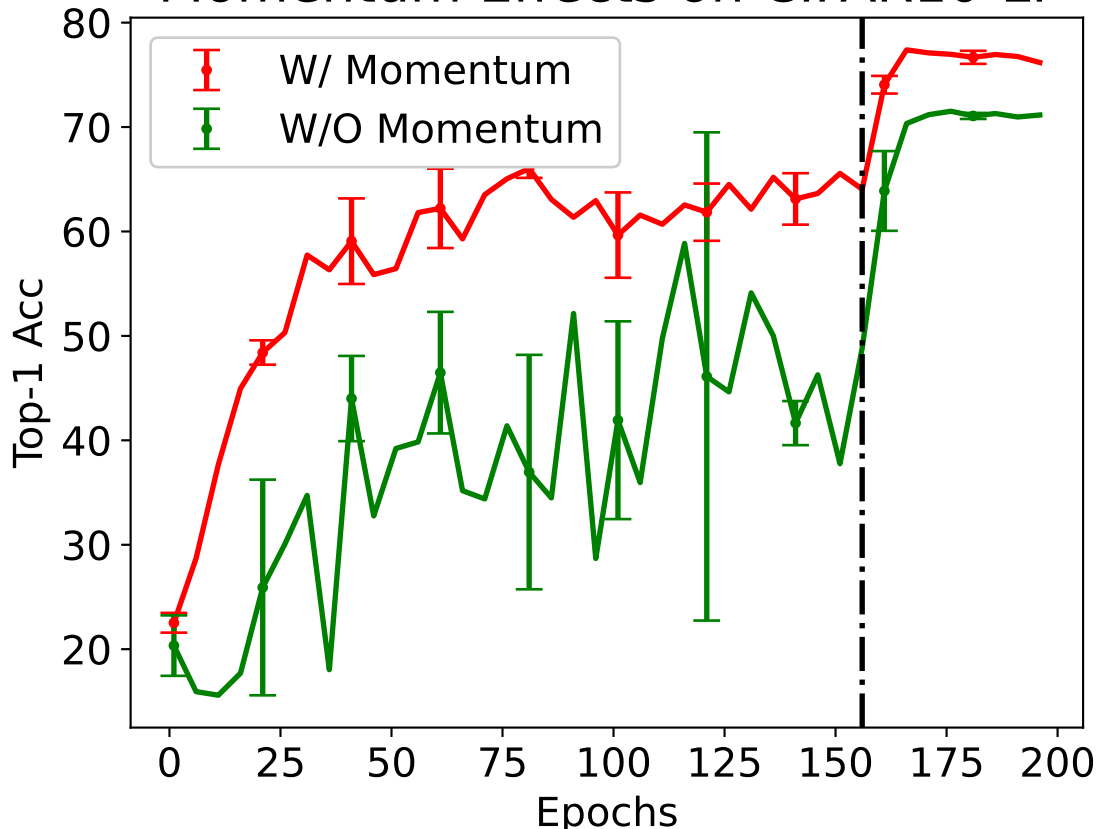

Supplement: supplementary_material [file attachment]

# $\lambda$ Strategies on CIFAR100-LT

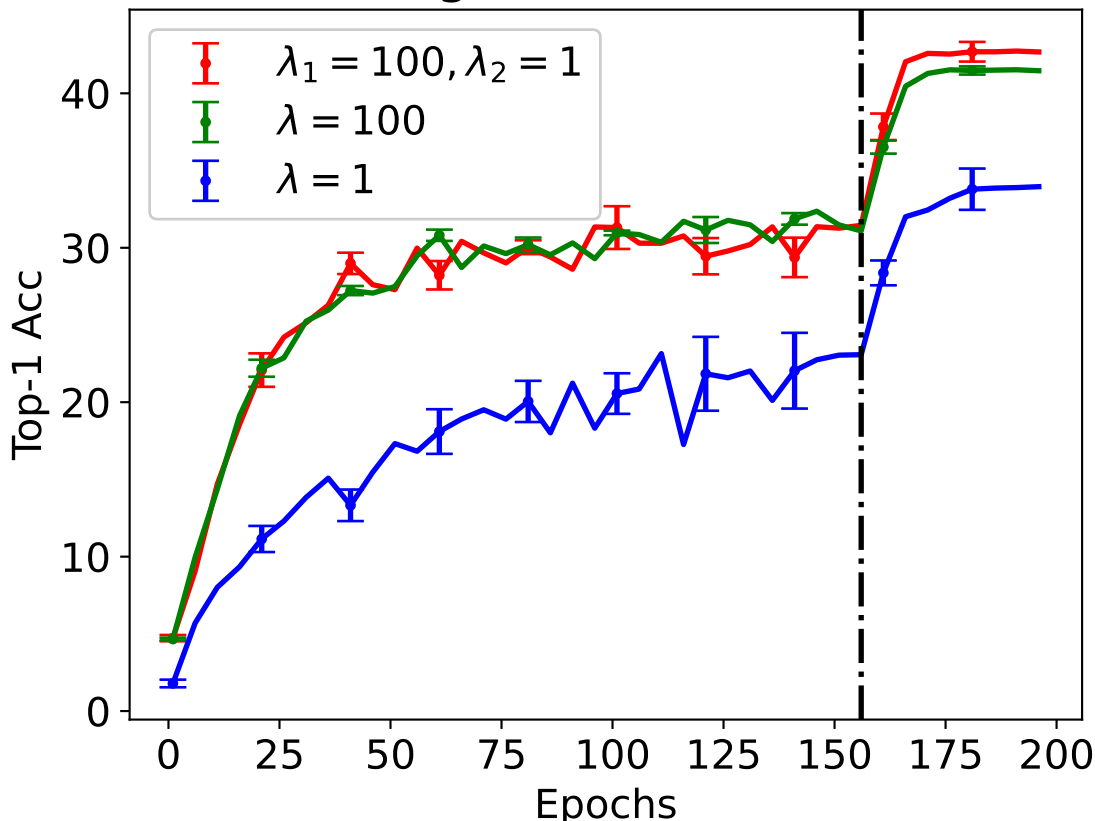

Supplement: supplementary_material [file attachment]

# Momentum Effects on CIFAR100-LT

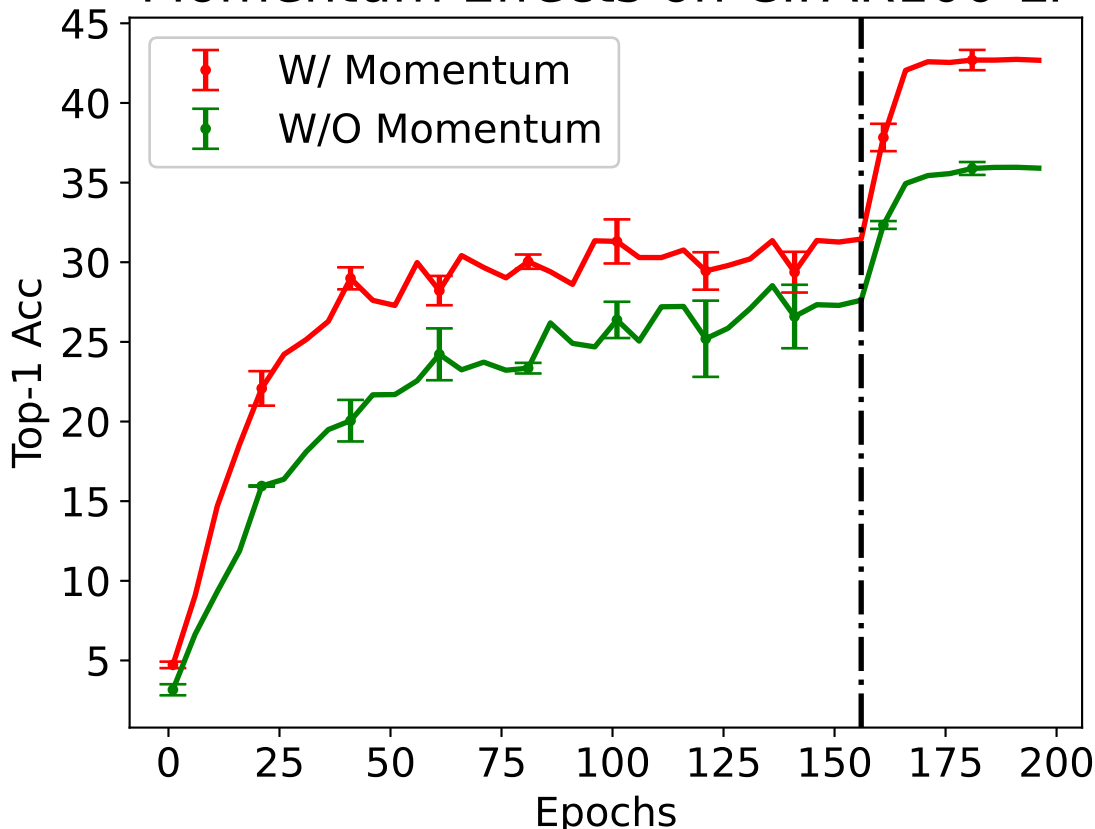

Supplement: supplementary_material [file attachment]
